# Supplementary material
Source: PubMed Central journal article supplement (PMC5210724)
Supplement: supp_pp.16.01256_PP2016-01256R1_Figure_S1.pdf [file supp_pp.16.01256_PP2016-01256R1_Figure_S1.pdf]

1  
2

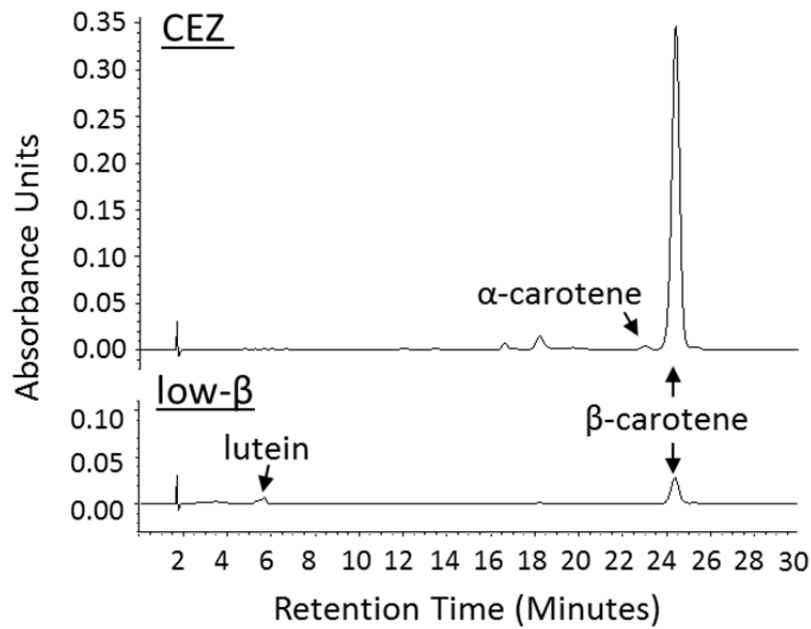

3

4 **Figure S1:** HPLC chromatogram showing absorbance at 450nm of carotenoids extracted  
5 from CEZ (top) and 'low-β' (bottom) mature fruit mesocarps. Beta-carotene, α-carotene  
6 and lutein were identified based on their retention times, distinctive peak spectra and  
7 comparisons with authentic standards. Beta-carotene was detected in both genotypes  
8 while lutein was detected only in 'low-β' and α-carotene only in CEZ. Note that β-  
9 carotene is clearly more abundant in 'CEZ than in 'low-β'.

10
