# Supplementary material
Source: PubMed Central journal article supplement (PMC5210724)
Supplement: supp_pp.16.01256_PP2016-01256R1_Figure_S2.pdf [file supp_pp.16.01256_PP2016-01256R1_Figure_S2.pdf]

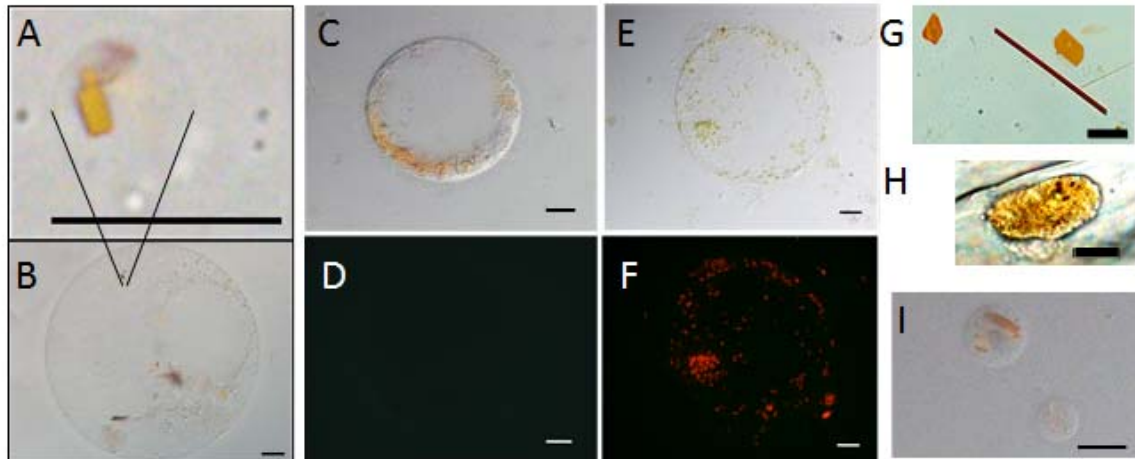

1

2 **Figure S2:** Visual display of bright visible light (BVL) and fluorescent microscopy of CEZ  
 3 and 'low-β' fruit mesocarp protoplasts. Bars=20μm. **A** Microscopic visual display of a β-  
 4 carotene crystal within a chromoplast of CEZ protoplast from mesocarp tissue under  
 5 BVL; **B.** Microscopic view of the entire protoplast in which 'A' was captured under BVL;  
 6 **C.** Microscopic view of CEZ protoplast with high β-carotene content; **D** Fluorescence  
 7 analysis (excitation with 488 nm; emission was recorded with a BA 660 IF filter) of 'C'  
 8 reveals the absence of chlorophylls and, indicating absence of chloroplasts; **E.** Fruit  
 9 mesocarp protoplast of 'low-β' with high chloroplast content; **F.** Chlorophyll  
 10 autofluorescence emission of 'E' indicates the presence of chloroplasts; **G.** Microscopic  
 11 visual display of typical β-carotene crystals shapes: thin polygons sheets and long rods;  
 12 **H.** Microscopic visual display of a β-carotene aggregate; **I.** Microscopic visual display of a  
 13 relatively small-sized protoplasts of CEZ fruit mesocarp containing β-carotene crystals  
 14 and chromoplasts.

15
