# Supplementary material
Source: PubMed Central journal article supplement (PMC5210724)
Supplement: supp_pp.16.01256_PP2016-01256R1_Figure_S3.pdf [file supp_pp.16.01256_PP2016-01256R1_Figure_S3.pdf]

1 CEZ

2 ATGGATCGAGTTTGGTGGCTTCATATCCAATCAATCATCTGATTGACCTCACAGTTTCG**T**ATCGATTACTGTTGGAGCACTTGTTCACTCCAGGTTGAATTCTGGTA  
3 AAGAACGGCAGAAGTTGAGCTCGAGGTGGCGATGGCGATCCATGGCCTCGGATTCTACTGACTCTTCTTCTTCTTCTTTTGTCCGTCTGTTGAATCTGATCCTTCGGA  
4 TAAACTTCAGCCAGTTTTGTATCATAGAGGGACCGAAACAGTACAAGATTTTGCAAAAATGGAATGCAAGAG**G**ATTCAAGGAGAACATTCGAAGT**C**ATCGAAACAAA  
5 ATTTTCTTGCATATGGAAGAGGTTTCGTCGGCTGAGGATACAACAGAGAATAAA**G**AATG**C**A**G**AACCTTGAATTTCAAAGGAAGAGCGAGAGAATGAATTACCCAATTTTC  
6 CATCATTATTCCATTCTTACCCCGCTGAGTTCAGAGAACCTG**AAG**CTGTAATGTTACATGCTATTCTTATTGCTGGCATAATACTATTGGAGGTCTATTAGCACCC  
7 ACGCTTGAGCTGAAGCTGGGACTGGGAGGTACATCATATGAAGATTTTATTCGTAGTGTGCATCTCCAATGCAGCTAAGTCAAGTTGATCCGATTGGGCATCTTTTCG  
8 GGAGGAGCAGTCGGGGTGATTCAGCCCTTATGGTTGTTGAAGTAAACAATGTAAGCAACAAGAGCATAAAAGATGCAAATACTGTCTTGGCACTGGATACTTGGCAT  
9 GTGCTCGCTGTTCAAACACAGGAGCTCTTGTGCTGATTGAGCCAGTATCGACTTTAAATGGTGAACATCAGCCTCT**G**TCGCTACCTAAGACTGAAAGATGCCAAAATTGTT  
10 CGGGTTCAGGAAAGGTTATGTGCCCTACATGTCTTTGACTGGTATGGCAATGGCTAGTGAACACGACCCACGAATTGATCCCTTCGACTAG

11 'low β'

12 ATGGATCGAGTTTGGTGGCTTCATATCCAATCAATCATCTGATTGACCTCACAGTTTCG**T**ATCGATTACTGTTGGAGCACTTGTTCACTCCAGGTTGAATTCTGGTA  
13 AAGAACGGCAGAAGTTGAGCTCGAGGTGGCGATGGCGATCCATGGCCTCGGATTCTACTGACTCTTCTTCTTCTTCTTTTGTCCGTCTGTTGAATCTGATCCTTCGGA  
14 TAAACTTCAGCCAGTTTTGTATCATAGAGGGACCGAAACAGTACAAGATTTTGCAAAAATGGAATGCAAGAG**G**ATTCAAGGAGAACATTCGAAGT**C**ATCGAAACAAA  
15 ATTTTCTTGCATATGGAAGAGGTTTCGTCGGCTGAGGATACAACAGAGAATAAA**G**AATG**C**A**G**AACCTTGAATTTCAAAGGAAGAGCGAGAGAATGAATTACCCAATTTTC  
16 CATCATTATTCCATTCTTACCCCGCTGAGTTCAGAGAACCTG**TAG**CTGTAATGTTACATGCTATTCTTATTGCTGGCATAATACTATTGGAGGTCTATTAGCACCC  
17 ACGCTTGAGCTGAAGCTGGGACTGGGAGGTACATCATATGAAGATTTTATTCGTAGTGTGCATCTCCAATGCAGCTAAGTCAAGTTGATCCGATTGGGCATCTTTTCG  
18 GGAGGAGCAGTCGGGGTGATTCAGCCCTTATGGTTGTTGAAGTAAACAATGTAAGCAACAAGAGCATAAAAGATGCAAATACTGTCTTGGCACTGGATACTTGGCAT  
19 GTGCTCGCTGTTCAAACACAGGAGCTCTTGTGCTGATTGAGCCAGTATCGACTTTAAATGGTGAACATCAGCCTCT**G**TCGCTACCTAAGACTGAAAGATGCCAAAATTGTT  
20 CGGGTTCAGGAAAGGTTATGTGCCCTACATGTCTTTGACTGGTATGGCAATGGCTAGTGAACACGACCCACGAATTGATCCCTTCGACTAG

21

22 **Figure S3:** *CmOr* coding sequence of CEZ and 'low β'. The six SNPs that define the allelic  
23 variation of *CmOr* (Tzuri et al., 2015) are highlighted in yellow; the defined 'golden' SNP  
24 is also bolded and underlined. CEZ and 'low β' share the dominant allele of orange  
25 fruited melon plants (A in the 'golden' SNP). The sequence difference between CEZ and  
26 'low β' is highlighted in green; a transversion of A<sup>487</sup> to T changes AAG to TAG which  
27 changes the lysine codon into a STOP codon.

28
