# Supplementary material
Source: PubMed Central journal article supplement (PMC5210724)
Supplement: supp_pp.16.01256_PP2016-01256R1_Figure_S4.pdf [file supp_pp.16.01256_PP2016-01256R1_Figure_S4.pdf]

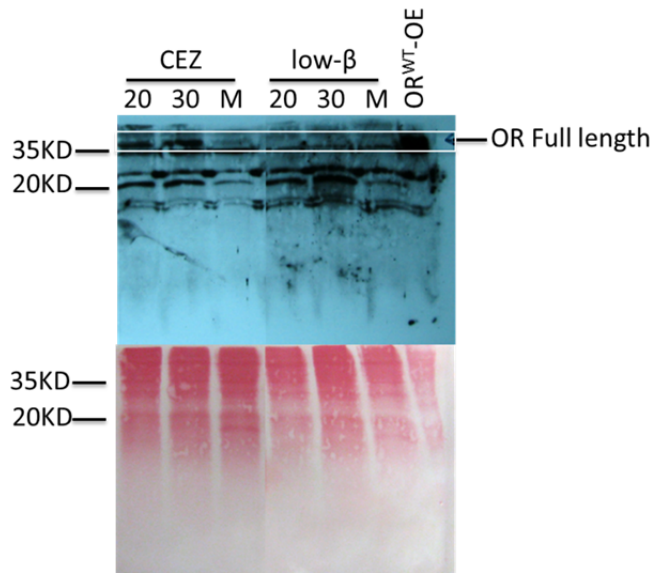

1

2 **Figure S4:** A truncated form of CmOR protein was not detected in high density (15%)  
 3 fractionating gel. CmOR protein levels in fruit flesh of CEZ and of the 'low β' mutant at  
 4 20 and 30 DAA and in mature fruit flesh (M) were detected by immunoblotting analysis  
 5 using polyclonal antibodies against BoOR. No unique band was found in 'low β' at the  
 6 expected 18 KDa truncated protein size. Ponceau S staining shows protein loading.
