# Supplementary material
Source: PubMed Central journal article supplement (PMC5210724)
Supplement: supp_pp.16.01256_PP2016-01256R1_Figure_S5.pdf [file supp_pp.16.01256_PP2016-01256R1_Figure_S5.pdf]

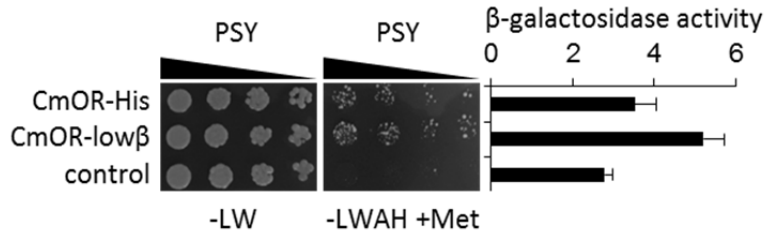

1

2 **Figure S5:** Yeast split ubiquitin analysis. Interactions between CmPSY-His-Cub  
 3 (horizontal), Nub-CmOR-His and Nub-CmOR-lowβ (vertical) were examined by growing  
 4 yeasts on either nonselective (-LW) or fully selective medium supplemented with  
 5 150μM methionine to reduce weak background autoactivation of reporter genes and to  
 6 visualize different interaction strengths (-LWAH+Met) in a series of 10-fold dilutions.  
 7 Empty vector expressing nub only is included as a control. lacZ reporter gene activity  
 8 was quantified by oNPG assays (right) and is given in nmol oNP min<sup>-1</sup> OD600<sup>-1</sup>. Results  
 9 are mean +/- SD from five biological replicates.

10
