# Supplementary material
Source: PubMed Central journal article supplement (PMC5210724)
Supplement: supp_pp.16.01256_PP2016-01256R1_Figure_S6.pdf [file supp_pp.16.01256_PP2016-01256R1_Figure_S6.pdf]

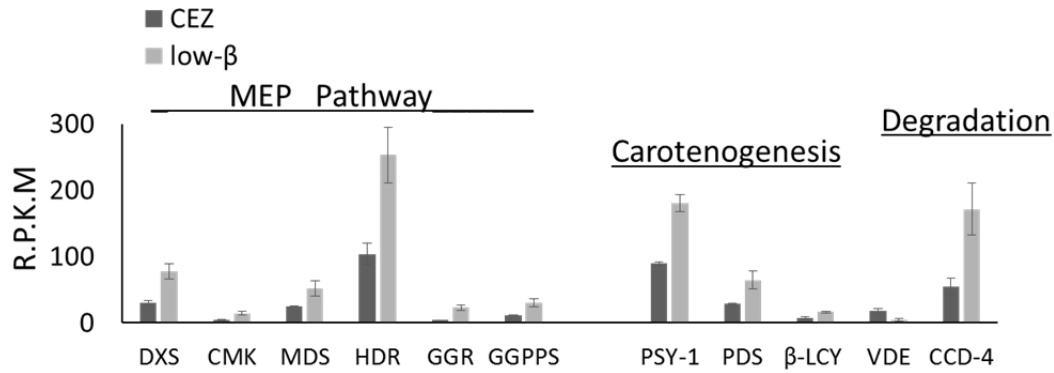

1

2 **Figure S6:** Different digital gene expression (RPKM) of metabolic genes in mature fruit  
 3 flesh of CEZ and 'low-β'. Results are mean +/- SE of three biological replicates.

4

5 MEP plastid localized methylerythriol 4-phosphate pathway.

6 DXS (MELO3C021375) 1-deoxy-D-xylulose-5-phosphate synthase.

7 CMK (MELO3C015605) 4-diphosphocytidyl-2-C-methyl-d-erythritol kinase

8 MDS (MELO3C016339) 2-C-methyl-D-erythritol 2,4-cyclodiphosphate synthase

9 HDR (MELO3C018407) 4-hydroxy-3-methylbut-2-enyl diphosphate reductase

10 GGR (MELO3C017176) geranylgeranyl reductase

11 GGPPS (MELO3C020952) Geranylgeranyl pyrophosphate synthase.

12 PSY-1 (MELO3C025102) Phytoene synthase

13 PDS (MELO3C017772) Phytoene desaturase

14 β-LCY (MELO3C020744) Lycopene beta cyclase

15 VDE (MELO3C008677) Violaxanthin de-epoxidase

16 CCD-4 (MELO3C016224) carotenoid-cleavage- dioxygenase -4

17

18 MELO names from (<https://melonomics.net>)

19
