# Supplementary material
Source: PubMed Central journal article supplement (PMC5210724)
Supplement: supp_pp.16.01256_PP2016-01256R1_Figure_S7.pdf [file supp_pp.16.01256_PP2016-01256R1_Figure_S7.pdf]

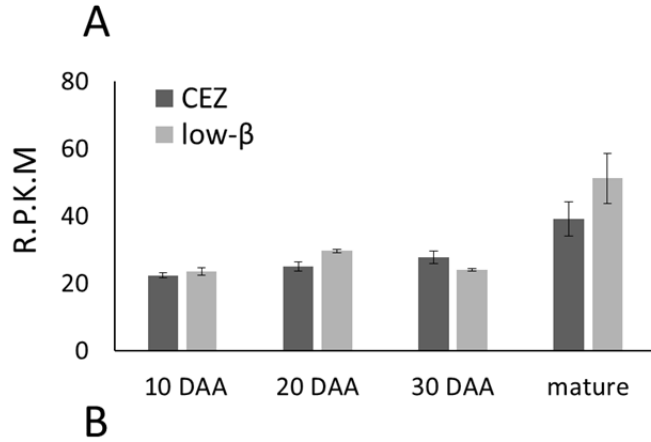

ATGTCCTACCTTCTACCTTCGCTCCTTCTCTCATTTCCTCCCTCCCAATTCACATTTCAAGCCCTCTGCCATTGCAGAGCTTCAATTT  
TCTTATCCATCGACTATGGATGCTGCAAATCCCTCTATGCATCCTCTAGGAATACTTCCCGACGATCGCTGCGCATCTGCGCTTCTTCGTC  
CGATGGCGCGTCGGCTTCAGTTCCTCTGATAGTGATAACACTCCCAGTAACCTTTGTATCATAGAAGGACCGGAGACCGTTCAGGAT  
TTTGTTGAGATGCAATTCAGGAAATCAAGACAACATAAGGAGTCGTCGTAATAAAATTTTCTTCTAATGGAAGAGGTTAGAAGAT  
TACGAATCAACAACGCTTGAAGAATCTAAAAGCTATCGATGAGAATGACAATGAAGAGGCGTATGAAATGCCTGAAATCCATCATC  
TATTCCTTTTCTTCCCCACGTGACACCTAAGACGTTGAAGCAGCAATATTAACCAGCTTGTCAGTTATATGGGGAATAATTGTATTGG  
TGGCTTTATTGCCCAACTCTGGAGCTAAAATTGGGATTAGGCGGCACCTTCGTACGAAGATTCATCCGCAACATGCATTGCCTATG  
CAATTAAGTCAAGTGGATCCCATAGTGGCGTCATTTTCAGGTGGAGCGGTAGGTGTCATTTCCGGCCTTGATGTTAATTGAAGCTAACA  
ATGTTGAGCAACAAGAGAAAAAAGGTGTAATATTGTCATGGAACCTGGGTATCTGGCTTGTGCTCGATGTTCTCCAGTGGCGTAT  
GCTTAAATGTTGACCCCATCTCACTATCTGCTTCTTCTAGCCGCCCTTACGAGTGCCCAAACTCAAAGATGTCTCAATTGTTCCGGT  
GCAGGAAAGGTAATGTGCCCAACATGTCTTTGCACGGGATGTTGATGGCAAGTGAGCATGACCCAAGATTCGACCCATTTGACTAA

1

2 **Figure S7:** *CmOr*-like (MELO3C024554) digital expression (A) and coding sequence (B).

3 Results are mean +/- SE of three biological replicates.

4
