# Supplementary material
Source: PubMed Central journal article supplement (PMC5210724)
Supplement: supp_pp.16.01256_PP2016-01256R1_Figure_S9.pdf [file supp_pp.16.01256_PP2016-01256R1_Figure_S9.pdf]

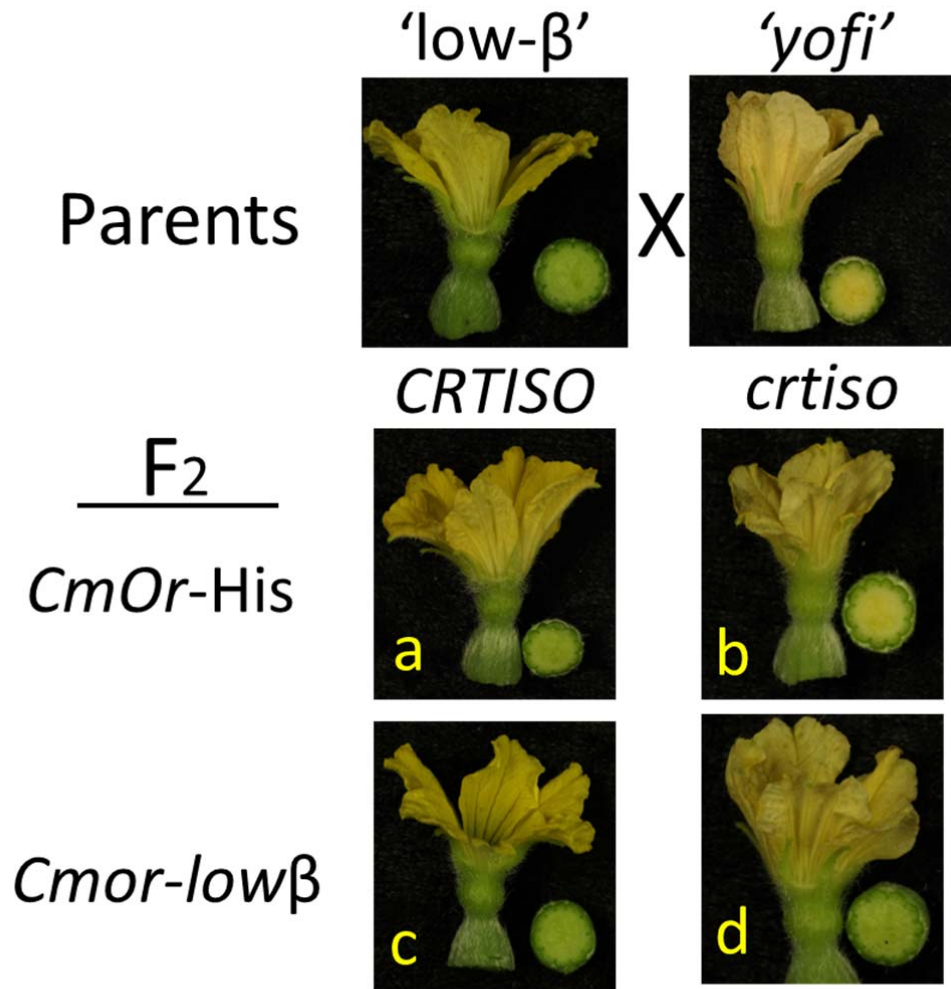

1

2 Figure S9: Transacted female flower at the day of anthesis exposing the ovule colour.  
 3 Parents are presented in the upper line and F<sub>2</sub> offspring flowers in the four lower panel  
 4 presenting the alleles combination as follows: **a**. Functional *CRTISO* and *CmOr-His*  
 5 homozygous alleles. **b** dysfunctional *crtiso* and *CmOr-His* homozygous alleles. **c**. Functional  
 6 *CRTISO* and *Cmor-lowβ* homozygous allele. **d**. dysfunctional *crtiso* and *Cmor-lowβ*  
 7 homozygous alleles.

8
